# Supplementary material for: Safety, Feasibility, and Efficacy of Early Rehabilitation in Patients Requiring Continuous Renal Replacement: A Quality Improvement Study
Source: PubMed Central journal article supplement — Kidney Int Rep. 2019 Oct 11;5(1):39–47. doi: 10.1016/j.ekir.2019.10.003 (PMC6943757; doi:10.1016/j.ekir.2019.10.003), 2019-10-11
Supplement: mmc1.pdf [file mmc1.pdf]

**Supplemental Figure 1:** Highest level of mobility achieved during rehabilitation sessions stratified by hospital mortality. Patients achieving higher levels of mobility were more likely to be alive at discharge, although not statistically significant ( $X^2 = 9.96$ ,  $p = 0.076$ , Cramer's  $V = 0.39$ ).

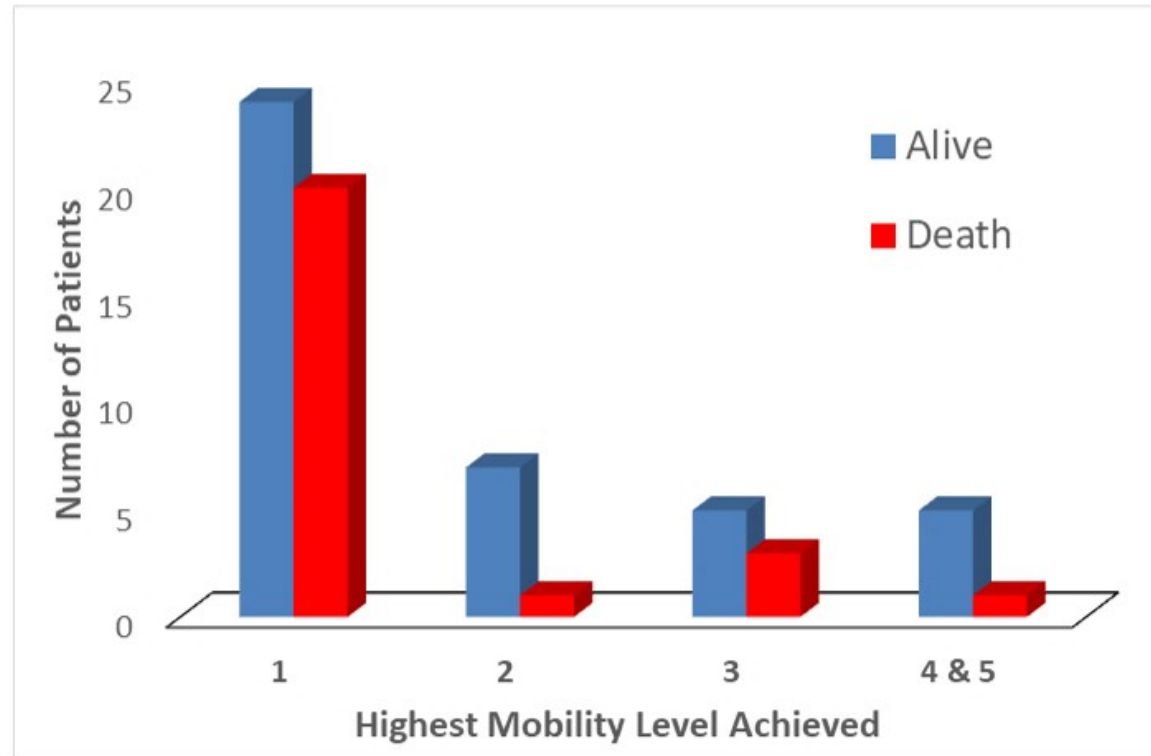

**Supplemental Table 1:** Multivariable logistic regression models of hospital mortality as the dependent variable and selected rehabilitation parameters analyzed as the main independent variable.

| <b>Variable</b>                                                            | <b>Odds Ratio</b> | <b>95% Confidence Interval</b> | <b>P value</b> |
|----------------------------------------------------------------------------|-------------------|--------------------------------|----------------|
| <b>Time from ICU admission to first rehabilitation session, per 1-day*</b> | 0.950             | 0.840-1.070                    | 0.414          |
| <b>Level of mobility achieved, per 1-level*</b>                            | 0.708             | 0.420-1.193                    | 0.195          |
| <b>Ratio of rehabilitation sessions per CRRT days*</b>                     | 0.169             | 0.001-15.92                    | 0.443          |
| <b>Number of completed rehabilitation sessions, per 1-session*</b>         | 0.868             | 0.560-1.340                    | 0.526          |

\*Each rehabilitation parameter was entered into a single model with candidate variables of liver disease, yes vs no; Charlson Comorbidity Index, per 1-unit, and Sequential Organ Failure Assessment (SOFA) at ICU admission, per 1-unit.
